# Supplementary material for: G-quadruplexes Mark Sites of Methylation Instability Associated with Ageing and Cancer
Source: MDPI journal article supplement (doi:10.3390/genes13091665), 2022-09-17
Supplement: s1 [file s1]

# G-quadruplexes mark sites of methylation instability associated with ageing and cancer

Jonas Rauchhaus<sup>1,2†</sup>, Jenna Robinson<sup>1,3,4†</sup>, Ludovica Monti<sup>1,4</sup> and Marco Di Antonio<sup>1,3,4\*</sup>

<sup>1</sup> Imperial College London, Chemistry Department, Molecular Science Research Hub, 82 Wood Lane, W12 0BZ, London, UK.

<sup>2</sup> Imperial College London, Department of Bioengineering, Royal School of Mines, Exhibition Road, SW7 2AZ, London, UK.

<sup>3</sup> Institute of Chemical Biology, Molecular Science Research Hub, 82 Wood Lane, W12 0BZ, London, UK.

<sup>4</sup> The Francis Crick Institute, 1 Midland Road, NW1 1AT, London, UK.

\* Correspondence should be addressed to Marco Di Antonio: m.di-antonio@imperial.ac.uk

† Authors contributed equally to the work.

## Supplementary Materials

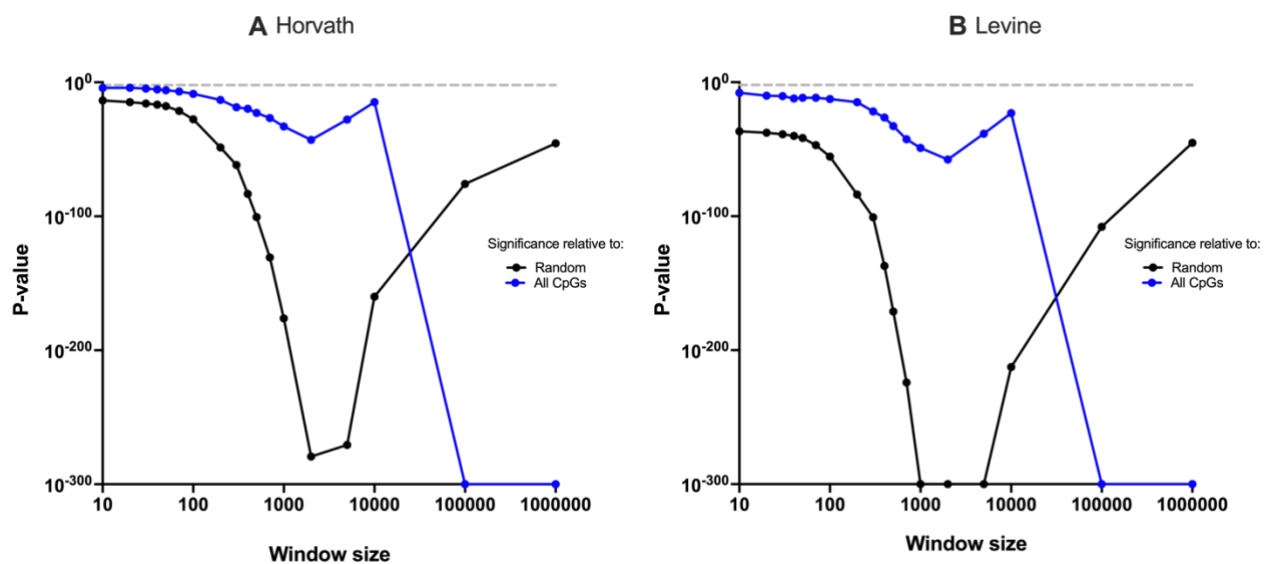

**Figure S1.** P-values for enrichment tests of G4s at A) Horvath and B) Levine human ageing clocks. Dotted line at  $p=0.01$  for reference.

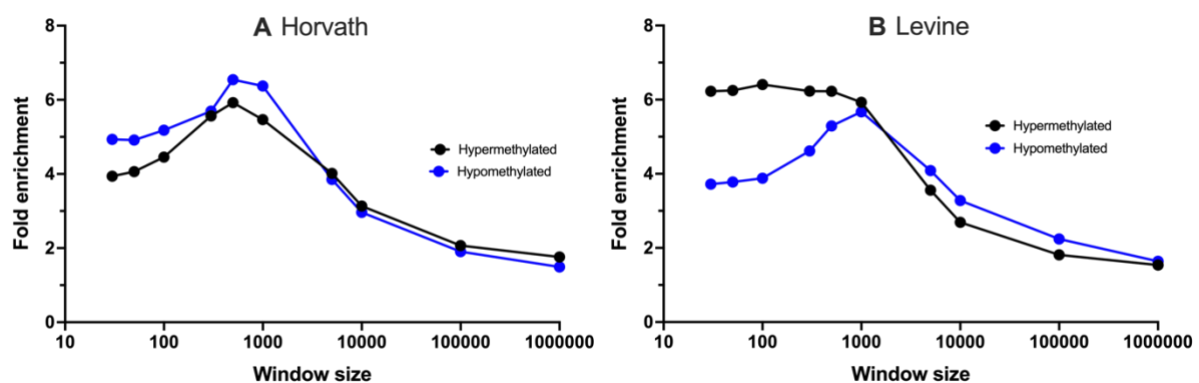

**Figure S2.** Enrichment of G4s at A) Horvath and B) Levine ageing clock CpGs that become hyper- or hypomethylated with age.

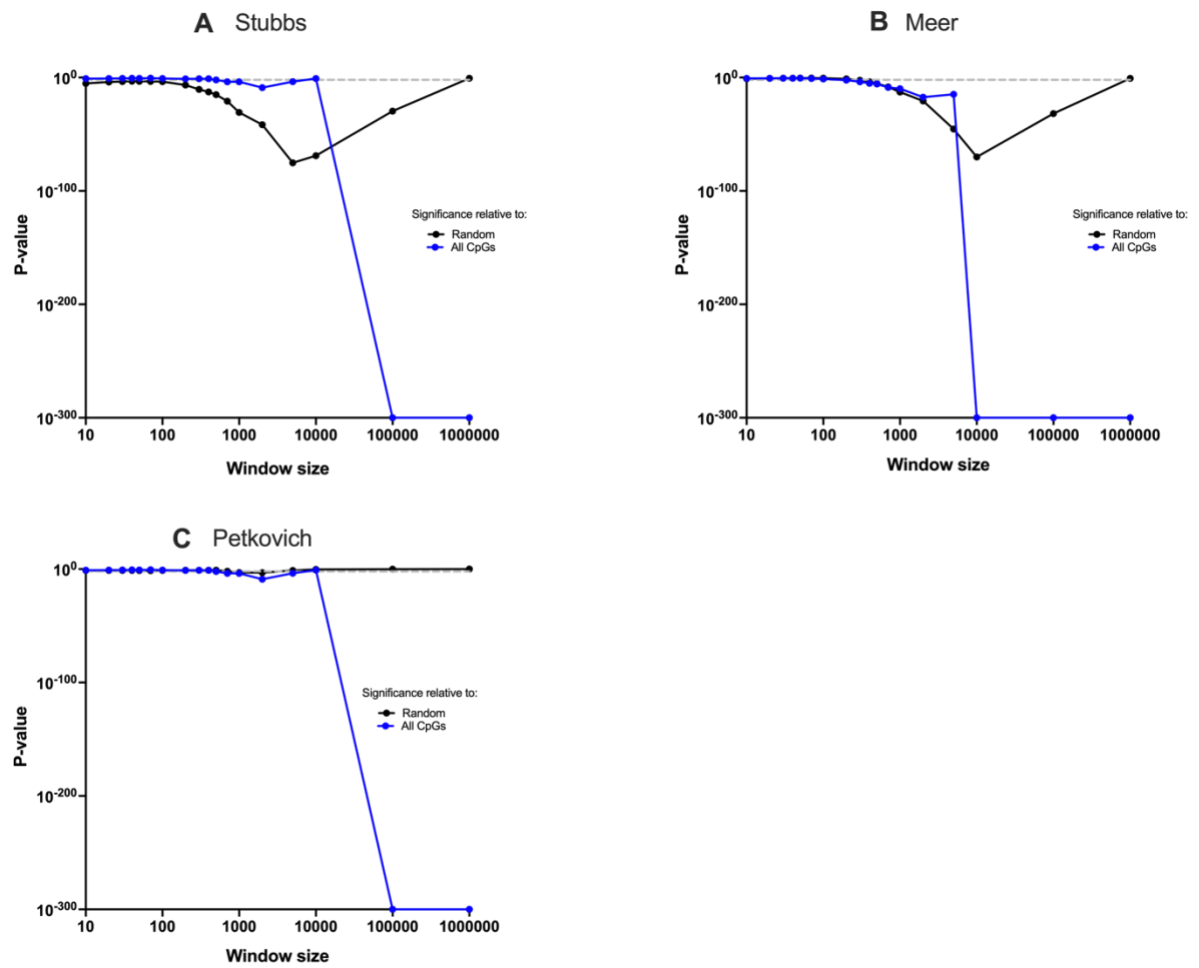

**Figure S3.** P-values for enrichment tests of G4s at A) Stubbs, B) Meer and C) Petkovich ageing clocks. Dotted line at  $p=0.01$  for reference.

## A NHEK

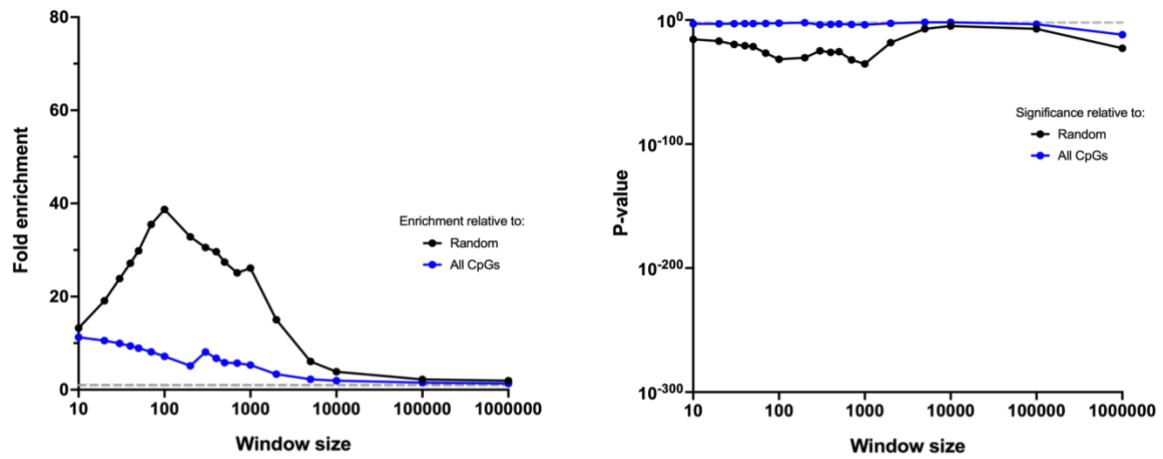

## B HaCaT

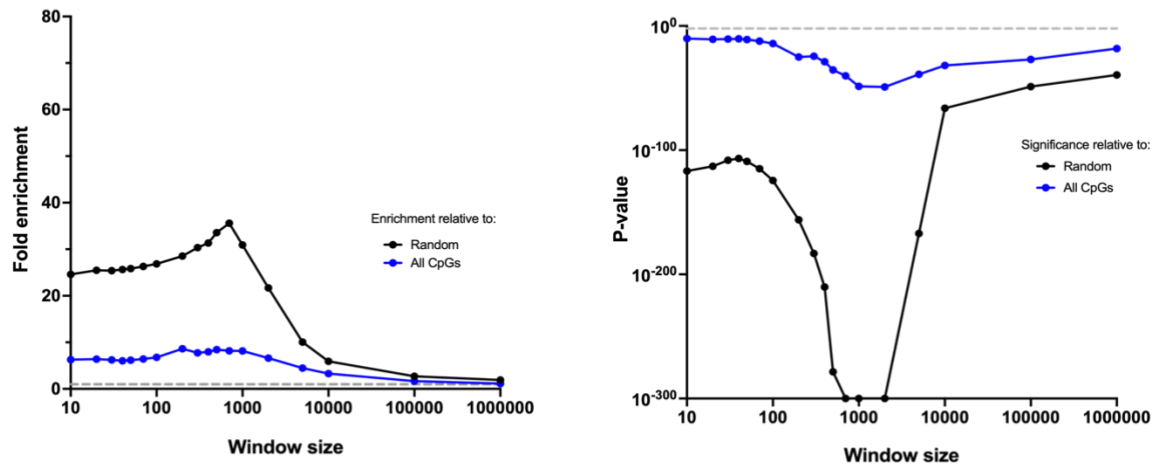

## C K562

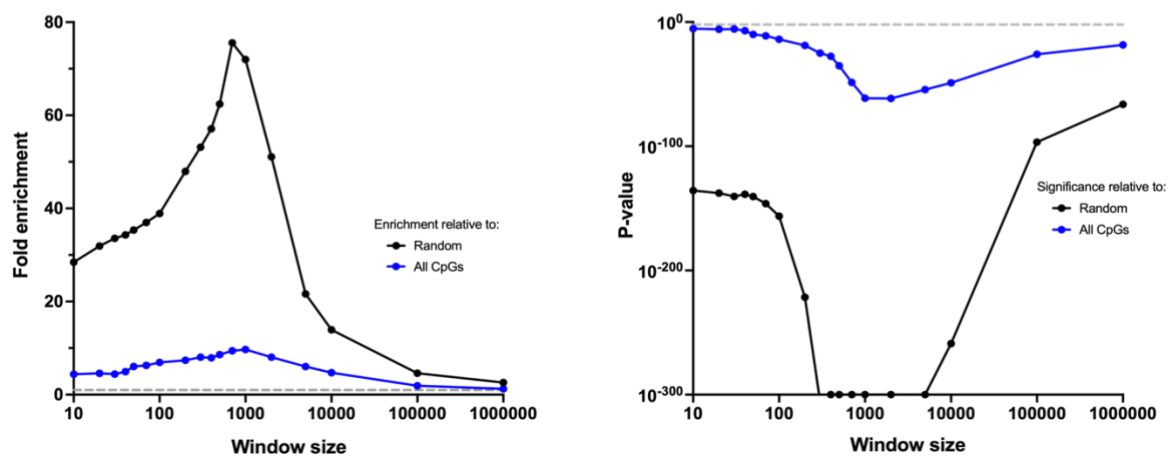

**Figure S4.** Fold enrichment and statistical significance of G4s around Horvath ageing clock CpGs. G4 coordinates were obtained from BG4-ChIP experiments in A) NHEK, B) HaCaT and C) K562 cells. Dotted line at fold enrichment = 1 and p-value = 0.01 for reference.

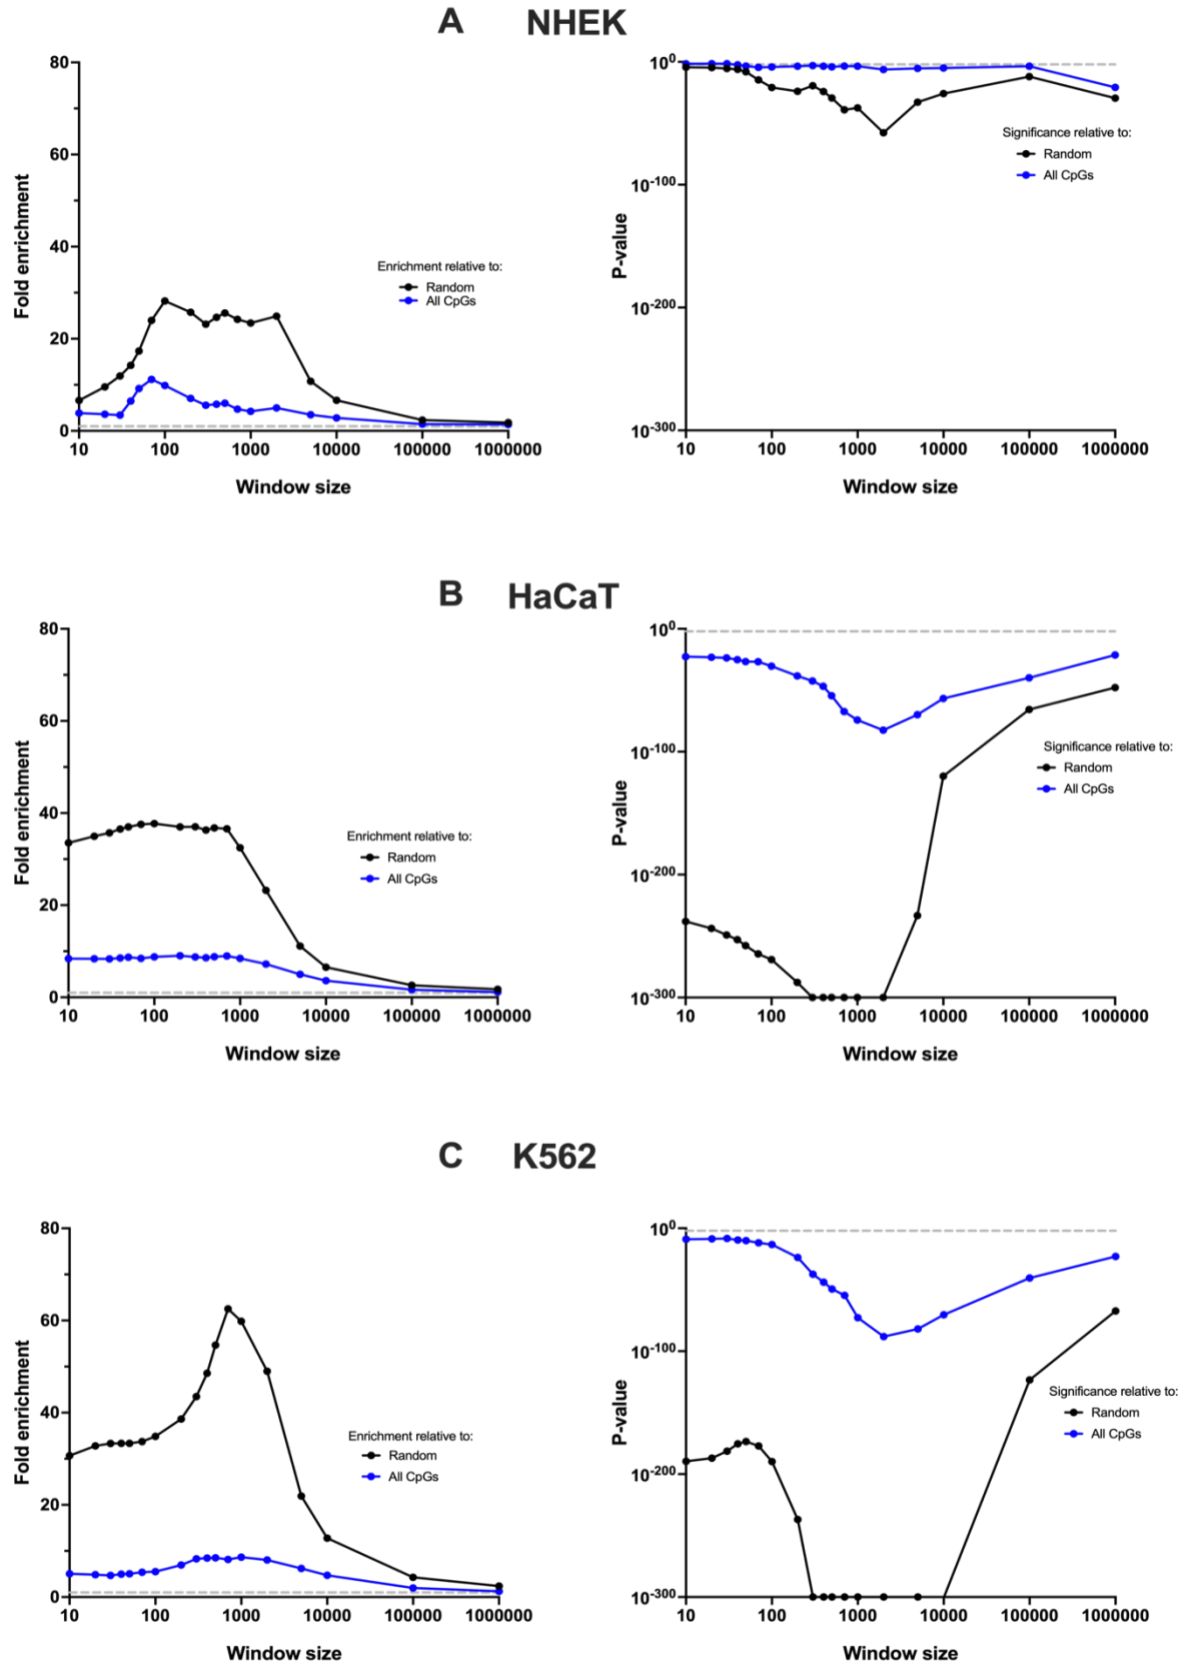

**Figure S5.** Fold enrichment and statistical significance of G4s around Levine ageing clock CpGs. G4 coordinates were obtained from BG4-ChIP experiments in A) NHEK, B) HaCaT and C) K562 cells. Dotted line at fold enrichment =1 and p-value=0.01 for reference.

Table S1 - Comparison of G4 enrichment at murine ageing clocks with and without random sampling

| <b>Window size<br/>(bp)</b> | <b>Meer</b> | <b>Meer sampled</b> | <b>Stubbs</b> | <b>Stubbs sampled</b> | <b>Petkovich</b> | <b>Petkovich sampled</b> |
|-----------------------------|-------------|---------------------|---------------|-----------------------|------------------|--------------------------|
| 10                          | 1.266600595 | 1.395348837         | 2.137265136   | 2.595155709           | 1.68411          | 1.290323                 |
| 50                          | 1.071241488 | 1.411079588         | 1.808966636   | 2.065469293           | 1.702308         | 1.401869                 |
| 100                         | 1.116058508 | 1.559121032         | 1.805344535   | 1.983995168           | 1.679104         | 1.219512                 |
| 500                         | 1.649907712 | 1.784517172         | 2.268597901   | 2.357960925           | 1.34373          | 1.601423                 |
| 1000                        | 1.726744797 | 1.724427112         | 2.365559251   | 2.320901619           | 1.693543         | 2.1875                   |
| 10000                       | 1.555206906 | 1.568476302         | 1.739769379   | 1.750721348           | 0.988199         | 1.026616                 |
| 1.00E+05                    | 1.268608707 | 1.262819813         | 1.318043275   | 1.32873031            | 0.83681          | 1.015419                 |
